# Supplementary material for: LRRC4 mediates the formation of circular RNA CD44 to inhibitGBM cell proliferation
Source: PubMed Central journal article supplement — Mol Ther Nucleic Acids. 2021 Aug 26;26:473–87. doi: 10.1016/j.omtn.2021.08.026 (PMC8479294; doi:10.1016/j.omtn.2021.08.026), 2021-08-26
Supplement: mmc1.pdf [file mmc1.pdf]

OMTN, Volume 26

## **Supplemental information**

### **LRRC4 mediates the formation of circular RNA CD44 to inhibit GBM cell proliferation**

**Jianbo Feng, Xing Ren, Haijuan Fu, Di Li, Xiguang Chen, Xuyu Zu, Qing Liu, and Minghua Wu**

## Supplementary Figures and Legends

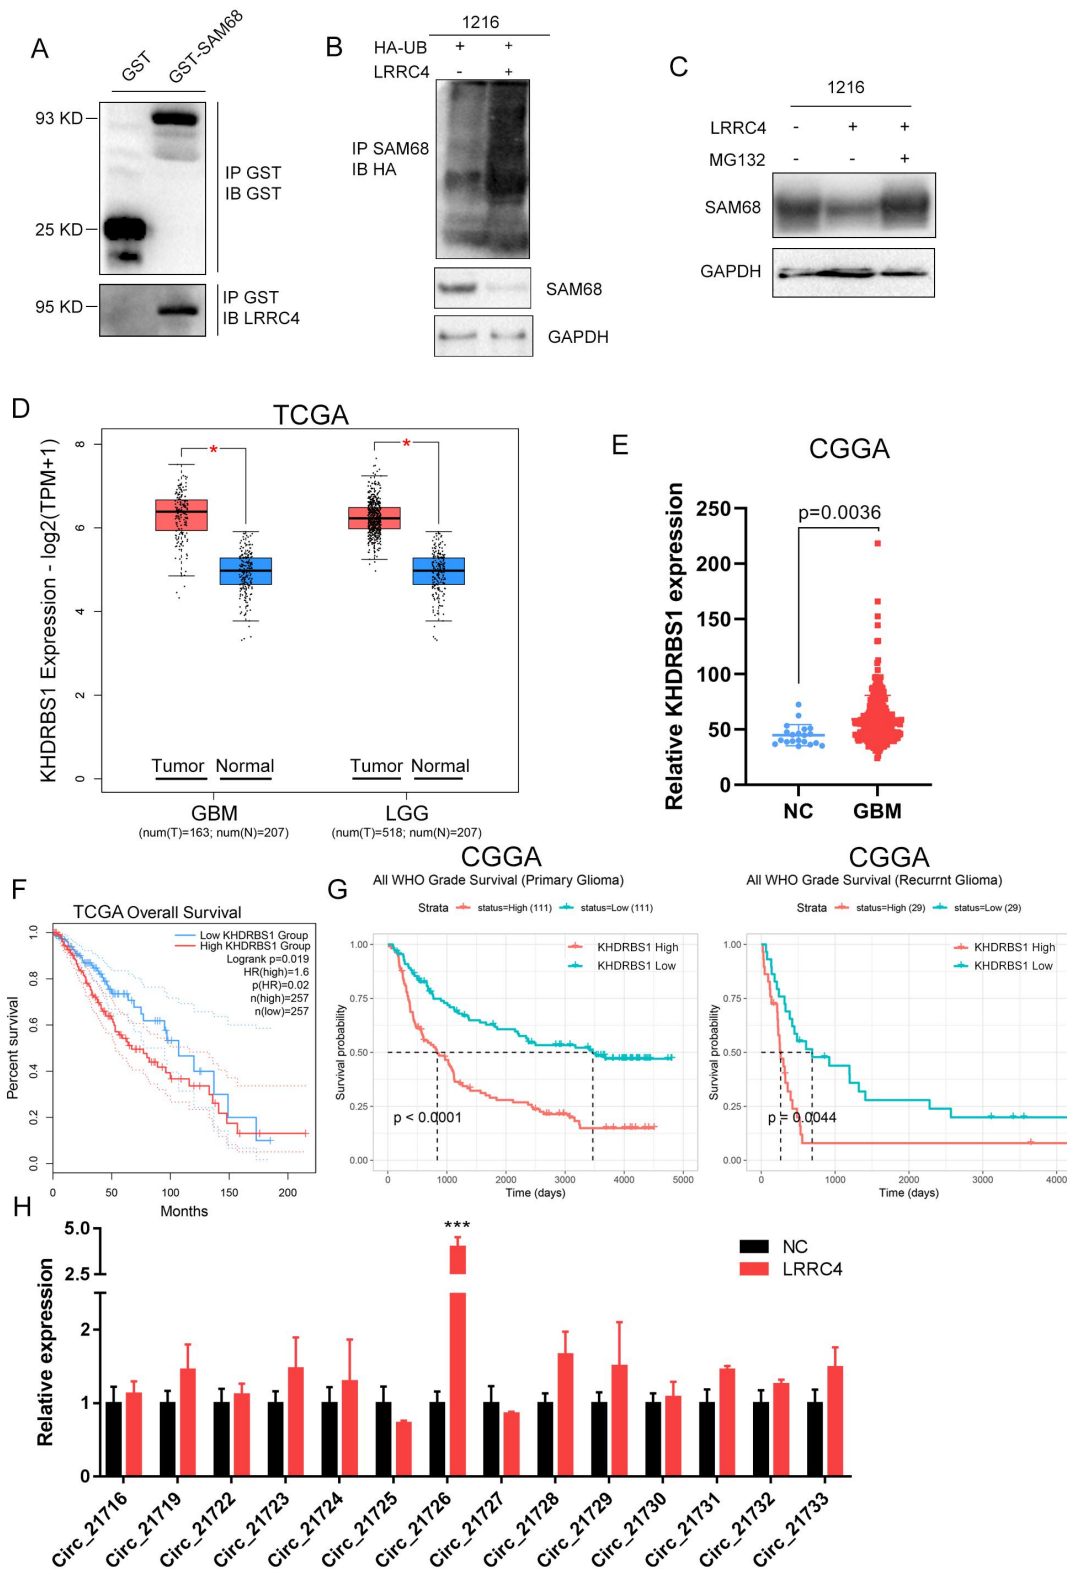

**Figure S1 SAM68 directly binding with LRRC4 and up-regulated in glioma**

**A:** GST pull-down assay revealed that LRRC4 was pulled down by GST-fused SAM68. **B:** Ubiquitin modifications assay revealed that the ubiquitin modifications of SAM68 were also increased by LRRC4. **C:** Western blotting showed that the

inhibition effect of LRRC4 on SAM68 was blocked when treatment with MG132. **D:** By TCGA dataset analysis, SAM68 is up-regulated both in GBM and LGG group. **E:** By CGGA dataset analysis, SAM68 is up-regulated in GBM. **F:** By TCGA dataset analysis, patients with higher SAM68 expression level have a worse prognosis than those patients with lower SAM68 expression level. **G:** In CGGA primary and recurrent glioma dataset, patients with higher SAM68 expression level have a worse prognosis than those patients with lower SAM68 expression level. **H:** RT-qPCR analyses showing that LRRC4 increases the expression of hsa\_circ\_0021726 in 1104 cells.

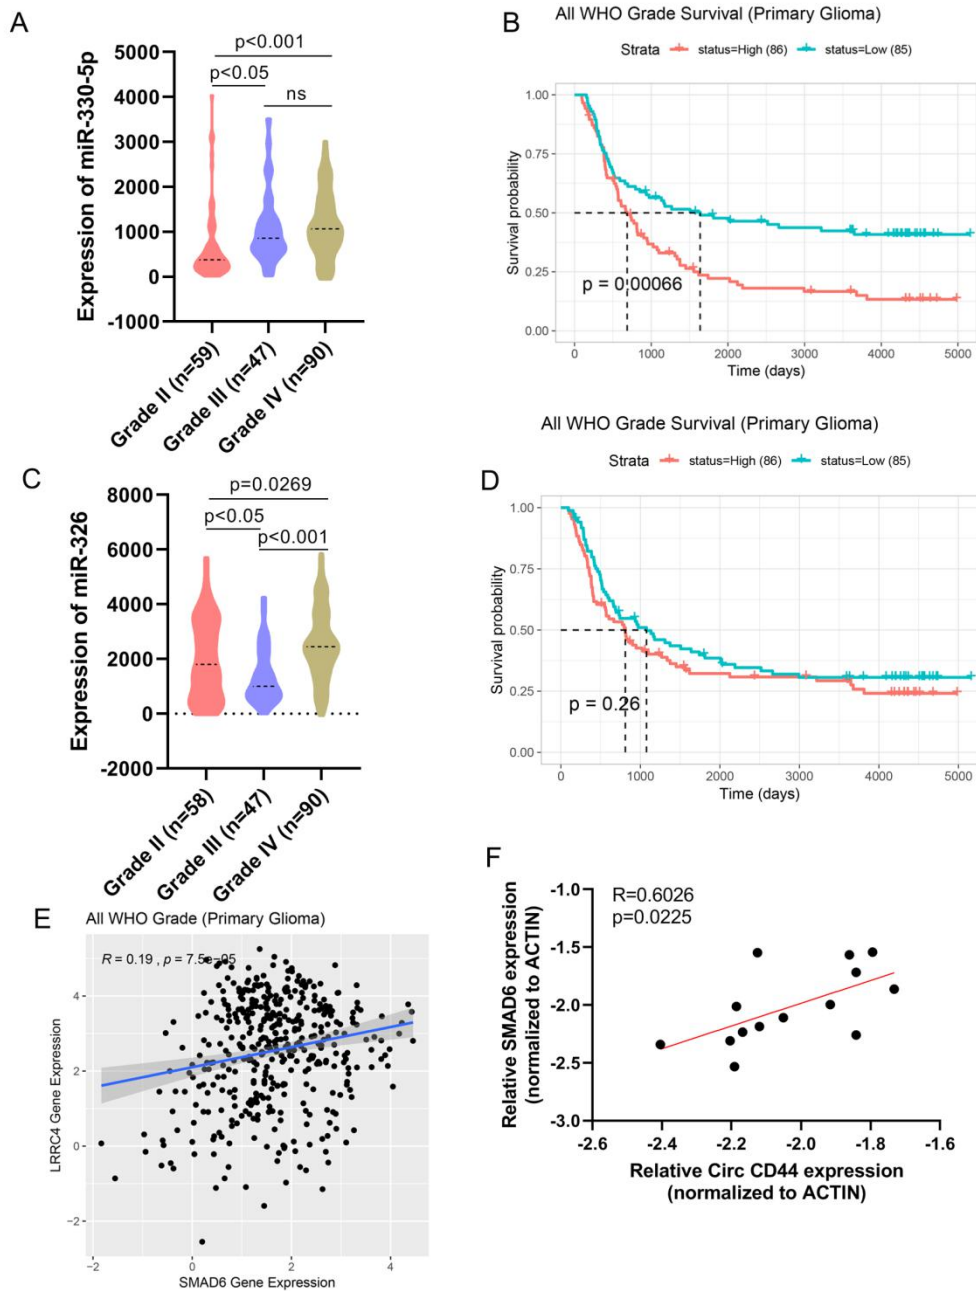

**Figure S2 database analysis of miR-326, miR-330-5p and LRRC4 in CGGA**

**A:** In CGGA database, the relative expression of miR-326 in different grade gliomas. **B:** Kaplan–Meier survival curves of glioma patients with higher or lower expression of miR-326. **C:** In CGGA database, the relative expression of miR-330-5p in different grade gliomas. **D:** Kaplan–Meier survival curves of glioma patients with higher or lower expression of miR-330-5p. **E:** Correlation between the expression of LRRC4 and SMAD6 in CGGA dataset was evaluated by Pearson’s correlation test. **F:** Correlation between the expression of circCD44 and SMAD6 in GBM samples was evaluated by Pearson’s correlation test.

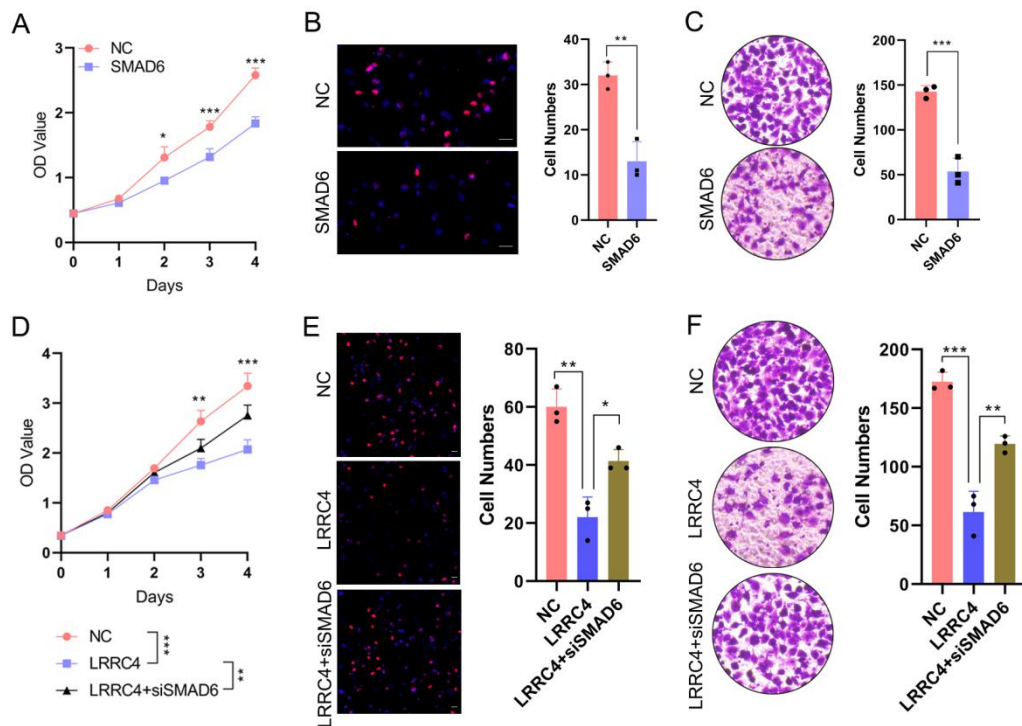

**Figure S3 The effect of SMAD6 on GBM cells proliferation and invasion**

**A:** The effect of ectopic SMAD6 expression on 1124C cells. proliferation was assessed by the CCK-8 cell growth assay. **B:** The effect of ectopic SMAD6 expression on 1124C cells was evaluated by EDU assay. **C:** The effect of ectopic SMAD6 expression on 1124C cells. Invasion was assessed by the transwell assay. **D:** 1124C cells were transfected with indicated vectors and siRNA, CCK-8 assays were performed to assess the proliferation ability of the transfected cells. **E:** 1124C cells were transfected with indicated vectors and siRNA, EDU assays were performed to assess the proliferation ability of the transfected cells. **F:** 1124C cells were transfected with indicated vectors and siRNA, transwell assays were performed to assess the invasion ability of the transfected cells.

**Supplementary Table 1** A total of 41 miRNAs were found to potentially bind circCD44 in Circular RNA Interactome online database

| 41 miRNAs were showed as follow: |                |                |              |
|----------------------------------|----------------|----------------|--------------|
| hsa-miR-1184                     | hsa-miR-145    | hsa-miR-562    | hsa-miR-1270 |
| hsa-miR-1208                     | hsa-miR-326    | hsa-miR-577    | hsa-miR-620  |
| hsa-miR-1231                     | hsa-miR-330-5p | hsa-miR-579    | hsa-miR-636  |
| hsa-miR-1236                     | hsa-miR-370    | hsa-miR-580    | hsa-miR-640  |
| hsa-miR-1248                     | hsa-miR-382    | hsa-miR-583    | hsa-miR-644  |
| hsa-miR-1257                     | hsa-miR-433    | hsa-miR-599    | hsa-miR-649  |
| hsa-miR-1287                     | hsa-miR-488    | hsa-miR-593    | hsa-miR-661  |
| hsa-miR-1289                     | hsa-miR-502-5p | hsa-miR-609    | hsa-miR-665  |
| hsa-miR-1290                     | hsa-miR-556-5p | hsa-miR-615-5p | hsa-miR-873  |
| hsa-miR-1322                     | hsa-miR-558    | hsa-miR-616    | hsa-miR-924  |
|                                  |                |                | hsa-miR-934  |
